# Supplementary material for: Long-term Economic Effects of Aridification on the GDPs of Africa and Asia
Source: Research Square preprint supplement (doi:10.21203/rs.3.rs-396982/v1), 2021-04-06
Supplement: Supplementary file 1 [file 839b0316fab6c8357b322ac4.docx]

**Supplementary Material**

1. **Data description**

We collected high-frequency, geo-referenced data from various sources. We compiled a global dataset for the period 1990–2015. We constructed a dataset of socio-economic, weather, and agricultural variables with a raster grid structure: the units of observation were subnational “cells” of 0.5 degrees of latitude by 0.5 degrees of longitude (approximately 56 km at the equator) for a period of 26 years[[1]](#footnote-1).

*Climate time-series data*

The Climatic Research Unit (CRU) TS4.04 variables are cloud cover, diurnal temperature range, frost day frequency, wet day frequency, potential evapotranspiration (PET), precipitation, daily mean temperature, monthly average daily maximum and minimum temperature, and vapour pressure for the period from January 1901–December 2019 [27].

The CRU TS4.04 data were produced using angular-distance weighting (ADW) interpolation. The CRU TS4.04 data are monthly gridded fields based on monthly observational data calculated using daily or sub-daily data at the National Meteorological Services and other external agents. The ASCII and NetCDF data files both contain monthly mean values for the various parameters. The NetCDF versions include an additional integer variable “stn”, which provides, for each datum in the primary variable, a count (between 0 and 8) of the number of stations used in that interpolation. The missing value code for “stn” is -999. All CRU Time-series (TS) output files are actual values and do not consider anomalies.

Regarding precipitation, potential evapotranspiration data were retrieved from the gridded Climatic Research Unit (CRU) Time-series (TS) version 4.00. Data are month-by-month variations in climate variables from 1901–2015. The data are provided on high-resolution (0.5◦ × 0.5◦) grids, produced by CRU at the University of East Anglia and funded by the UK National Centre for Atmospheric Science (NCAS), a NERC collaborative centre.

Precipitation is available for each month from 1901 to 2015 and is expressed as the average monthly millimetres of rainfalls (mm/month). For each year, we computed the average monthly precipitation (mm/month). Different from precipitation data, potential evapotranspiration data are available daily in the same period and are expressed as mm/day. To assess the empirical evaluations of both precipitation and the effects of PET, we computed the average monthly PET (mm/month) for each year. Further details on the construction of climate data use are provided in Appendix A. We also used average annual temperature as a climate grid-specific control variable. Gridded data on temperature were retrieved from the CRU TS dataset.

The AI was constructed using both precipitation and potential evapotranspiration data. For the construction of the AI, we referred to the definition provided by Middleton and Thomas (1997). Annual AI for the grid cell *i* at year *t* is defined as the ratio between average precipitations and PET of year *t* in cell *i*, and it is therefore expressed in millimetres of water effectively available on the ground, as follows:

Therefore, AI is defined as the yearly average of precipitation (P) over potential evapotranspiration (PET).

*GDP per capita*

An increasing amount of high-resolution global spatial data is available for use in various assessments. However, key economic and human development indicators are still mainly provided only at the national level, and they are downscaled by users for gridded spatial analyses. Instead, it would be beneficial to adopt data for subnational administrative units where available, supplemented by national data where necessary. To assess the economic effects of soil aridification due to climate change, we used the GDP per capita (PPP) dataset from Kummu et al. (2018) and represented the average gross domestic product per capita in a given administrative area unit. GDP is in 2011 international US dollars.[[2]](#footnote-2) The complete dataset provides annual gridded datasets on GDP per capita (PPP), total GDP (PPP), and the Human Development Index for the entire five arc-min resolutions for the 26 years ranging from 1990–2015.

The statistics on weather variables and GDP per capita are summarised in Table 1.

Table 1: Summary statistics and panel data sample

| Variable | Unit | Obs. | Mean | Std. Dev. | Min | Max |
| --- | --- | --- | --- | --- | --- | --- |
| Precipitation | mm/month | 1,601,730 | 5.209725 | 5.675847 | 0 | 90.96001 |
| PET | mm/month | 1,601,730 | 8.300419 | 5.05923 | 0 | 24.5 |
| Aridity Index | mm/month | 1,601,730 | .9595675 | .942291 | 0 | 18.76085 |
| Temperature | °C | 1,601,730 | 13.81946 | 12.35726 | -20.1 | 37.7 |
| GDP per capita | USD 2011 | 1,601,730 | 22828.79 | 24064.07 | 0 | 199439.6 |

*Note.* Each observation is a cell.

1. **Methodology**

This section describes the analytical method used to assess the effects of soil aridification on economic development. We estimated a model that includes linear and quadratic regressors for the Aridity Index (AI) specific to the cell to assess the non-linear effects of the desertification process. The rationale for this hypothesis is that we expected precipitation to positively affect economic development (at least in agriculture-centred economies through an increase in agricultural output). However, when precipitation increases too much (e.g., in the form of floods), the economic effects might be negative (Burke et al., 2015).

Our baseline regression was as follows:

where *yict* denotes the natural logarithm of GDP per capita of grid i, in country c, in year t. The temporal dependence of GDP per capita is represented by *yict−1* (i.e., the natural logarithm of GDP per capita of grid i, in country c, in year t − 1). *AIict* denotes the natural logarithm of the average annual Aridity Index of grid *i* in country *c* at year *t*. To account for the non-linear relationship between aridity and GDP per capita, we followed Burke et al. (2015)[[3]](#footnote-3) and included the quadratic term AI*2* in our baseline model. *Pict* is the logarithm of the average monthly amount of precipitation, while the variable *PETict* indicates the logarithm of the annual potential evapotranspiration. We also controlled for the average yearly mean surface temperature *Tict*. Finally, the model considers year-fixed effects, denoted as *σt*, grid fixed effects as *ωi*, and country linear trends as *ρcτ* to account for country-specific trends over time. We estimated equation (1) via a panel fixed effects estimator.

We first assess the effects of precipitation on GDP per capita, as obtained in previous economic studies. We find that annual variations in temperature and precipitation slowed economic growth, measured by GDP per capita by roughly 0.1 percentage points. These estimates are in line with Carleton and Hsiang (2016).

Table 1 shows our main results. The variables of interest are the annual Aridity Index, and the Aridity Index squared. Higher values of this variable corresponded to more humid and, therefore, less arid soil. We also controlled for the average near-surface temperature. The linear and quadratic terms for all climate indicators are included.

Columns (1)–(7) show the results of different specifications of the model described in equation 1. All specifications include year and grid fixed effects, as well as country linear trends. Specifically, in column (1), we consider only the contemporaneous linear effects of AI on GDP per capita. In this specification, a percentage point decrease in the AI in grid i is associated with a 0.5% decline in GDP per capita in the same grid. Column (2) shows both contemporaneous linear and quadratic effects of AI on the natural logarithm of GDP per capita. This specification confirms the positive relationship between the Aridity Index and GDP per capita. However, the inclusion of the quadratic term AI shows that significant increases in precipitation[[4]](#footnote-4) and PET[[5]](#footnote-5)are not positively associated with economic growth.

The inclusion of additional controls in the baseline equation (1) does not appear to change the impact of AI on GDP per capita change either in sign or in magnitude. In column (3), we added precipitation, PET, and temperature controls. In column (4), we restrict the analysis to only the African continent, whereas in column (5), we focus on Asian countries. These two continents are shown to be the most affected by human-induced soil aridification. Column (6) shows the effects of soil aridification, excluding areas that are already desert (i.e., AI < 0.05) or very humid (i.e., AI > 0.65). This further restriction is done because we expect the effects of desertification to be more pronounced in areas of the world that are not already desert. This specification shows that a one deviation decrease in the Aridity Index is associated with a 5.6% decrease in the GDP per capita of grid i in year t. Finally, column (7) replicates the results shown in column (6), focusing on Africa. Equation (1) also shows the positive relationship between additional climate variables (i.e., precipitation and temperature) and GDP per capita. Columns (3) to (7) show that a one standard deviation shock in annual precipitation levels affects GDP per capita between 1.6 and 2.5 percentage points. In contrast, a standard deviation shock in temperature levels contributes from 0.5 to 2.9 percentage points to the GDP per capita. However, the magnitude is lower compared to that of the Aridity Index. As shown in Table 2, the results revealed a robust positive relationship between GDP per capita and the Aridity Index.

We explored the sensitivity of our estimates to several models, aridity classes, and income groups. To confirm the results shown in Table 3, we first employed the Arellano-Bond estimation [22]. Here, we also considered that the lagged values of the predetermined regressors were instruments. The results are shown in Table 3, and they confirmed the adverse effects of soil aridification on GDP per capita. We also tested for serial correlations. We rejected no autocorrelation of order one but could not reject autocorrelation of order 2. There was evidence that the Arellano-Bond model assumptions were satisfied.

1. **Robustness**

We explored robustness to several types of soil aridity class and income groups because we expected that aridification would primarily affect poor economies more than advanced ones. The results of these robustness checks are shown in Tables 4 and 5 in the Appendix. The estimates reported in Tables 4 and 5 showed no relationship between the Aridity Index and GDP per capita in arid and humid areas of the world, respectively. This finding is consistent with the assumption that the effects of soil aridification should not be significant in regions already arid or areas characterised by high precipitation levels throughout the entire year. However, semi-arid and sub-humid areas are the most heavily penalised by the process of desertification. Second, soil aridification significantly affects areas characterised by low- and middle-income levels because they rely on agriculture, compared with high-income areas, which depend on other sectors. Finally, we controlled for the temporal as well as spatial dependence of both the dependent variable and covariates.

First, to control for temporal correlation of the Aridity Index and GDP per capita, we included temporal lags of the regressor and dependent variable.

where denotes the natural logarithm of GDP per capita of grid i in country c at time t. We considered the same fixed effects and linear trends used in the baseline equation (1) and estimate (2) via OLS.

Table 6 shows the results of equation (2). The regressor of interest is Log AI, which is defined as the natural logarithm of the Aridity Index in grid i at year t. Higher values of this variable correspond to higher “effective” water availability in the soil. In contrast, lower values correspond to the soil’s lower water availability (i.e., aridification of the land). We also controlled for additional grid-specific climate control variables, such as precipitation, potential evapotranspiration, and temperature, as well as year and grid fixed effects and country linear trends.

Column (1) shows a contemporaneous positive relationship between the Aridity Index and GDP per capita worldwide, including year and grid fixed effects but without considering additional climate controls. The positive relationship between the Aridity Index and GDP per capita did not vary when we included grid-specific controls (column 2) and temporal dependence of 2 years (column 3).

To account for spatial correlations in the covariates, we included spatial lags of the variables of interest. The spatial dependence structure is defined by a symmetric weighting matrix W, and the spatial lag of a variable is obtained by multiplying the matrix W by the vector of observations:

where denotes the natural logarithm of GDP per capita of grid i in country c at time t. As in equation (2), **X** denotes the vector of all grid-specific climate controls.

Most previous empirical work on the effects of climate on economic development has assumed that observations are independent across space. Instead, we estimate this relationship following Hsiang (2010) to adjust standard errors for both spatial and serial correlation. The spatial matrix W included in the dynamic model described in equation (2) exploits variations in the Aridity Index occurring in grids whose centroids are located within 56 km (or within 0.5-degree latitude and 0.5-degree longitude) as “first-degree neighbours”. In comparison, grids whose centroids are situated between 56 and 112 km (or within 1-degree latitude and 1-degree longitude) are defined as “second-degree neighbours”. Thus, our implicit identifying assumption is that climate shocks occurring in cells beyond 1-degree latitude and 1-degree longitude do not affect GDP in their own cells, with the exception of GDP per capita, which then spills over in space.

We chose to estimate a model that includes spatially and temporally autoregressive terms because, as highlighted in Harari and Ferrara (2018), ignoring the term WY could lead to an omitted-variable bias. As a result, the GDP would be attributed to GDP determinants that are clustered spatially, and the contemporaneous impact of climate shocks would tend to be overestimated. The results are shown in Table 7.

Finally, Tables 8 and 9 show the results of equation (3). In these tables, we consider both spatial and temporal dependence of the Aridity Index’s effects on the GDP per capita per income class as defined by the World Bank. Specifically, in column (1) of Table 8, we limit the effects to low-income areas of the world (i.e., a GDP per capita of 4,000USD or below). Column (2) shows the impact of the annual variations in the Aridity Index on lower-middle-income areas (i.e., between 4,000 USD and 8,000 USD). Finally, column (4) shows the effects on high-income regions (i.e., 12,000 USD and above). As usual, the regressor of interest is Log AI, showing the contemporaneous impact of the Aridity Index on the GDP per capita for each grid i. As expected, the strongest relationship is shown in columns (1) and (2) in low-and lower-middle-income areas. This result confirms that soil aridification primarily affects underdeveloped areas of the world. Those areas rely extensively on agriculture.

Table 2: Effects of AI, precipitation, and temperature on GDP per capita by year, grid fixed effects, and country trends

|  | (1) | (2) | (3) | (4) | (5) | (6) | (7) |
| --- | --- | --- | --- | --- | --- | --- | --- |
| VARIABLES | Ln (GDP) | Ln (GDP) | Ln (GDP) | Ln (GDP) | Ln (GDP) | Ln (GDP) | Ln (GDP) |
|  |  |  |  |  |  |  |  |
| Log AI | 0.00400*** | 0.00822*** | 0.00140 | 0.0692*** | 0.0131** | 0.00180 | 0.0364*** |
|  | (0.000268) | (0.000471) | (0.00209) | (0.00903) | (0.00637) | (0.00282) | (0.0101) |
| Log AI2 |  | 0.000640*** | 0.00132*** | 0.00109*** | 0.000989*** | 0.00459*** | 0.00371*** |
|  |  | (5.74e-05) | (6.49e-05) | (0.000106) | (0.000207) | (0.000376) | (0.000640) |
| Log Prec |  |  | 0.0144*** | -0.0557*** | 0.00377 | 0.0319*** | -0.00841 |
|  |  |  | (0.00235) | (0.00944) | (0.00709) | (0.00310) | (0.0102) |
| Log Temp |  |  | 0.00426*** | 0.0889*** | -0.00305*** | 0.00347*** | 0.0126*** |
|  |  |  | (0.000218) | (0.00323) | (0.000440) | (0.000281) | (0.00442) |
| Log GDP t-1 | 0.909*** | 0.909*** | 0.929*** | 0.885*** | 0.917*** | 0.928*** | 0.931*** |
|  | (0.000433) | (0.000433) | (0.000677) | (0.00170) | (0.00123) | (0.000874) | (0.00163) |
| Constant | 0.894*** | 0.897*** | 0.659*** | 0.787*** | 0.819*** | 0.678*** | 0.571*** |
|  | (0.00420) | (0.00420) | (0.00691) | (0.0187) | (0.0146) | (0.00938) | (0.0245) |
|  |  |  |  |  |  |  |  |
| Grid FE | YES | YES | YES | YES | YES | YES | YES |
| Year FE | YES | YES | YES | YES | YES | YES | YES |
| Country X Year FE |  |  | YES | YES | YES | YES | YES |
| World | YES | YES | YES |  |  | YES |  |
| Africa |  |  |  | YES |  |  | YES |
| Asia |  |  |  |  | YES |  |  |
| Arid and Sub-Humid |  |  |  |  |  | YES | YES |
|  |  |  |  |  |  |  |  |
| Observations | 1,623,531 | 1,623,531 | 1,101,680 | 250,125 | 293,405 | 680,713 | 137,182 |
| R-squared | 0.913 | 0.913 | 0.921 | 0.884 | 0.951 | 0.926 | 0.953 |
| Number of id | 65,247 | 65,247 | 55,026 | 10,005 | 18,320 | 43,299 | 6,654 |

*Note.* This table presents the effects of variation in the Aridity Index on GDP per capita at the grid level. Robust standard errors in parentheses *** p<0.01, ** p<0.05, * p<0.1

Table 3: Effects of AI, precipitation, and temperature on GDP per capita by Arellano-Bond estimates

|  | (1) | (2) | (3) | (4) | (5) | (6) | (7) |
| --- | --- | --- | --- | --- | --- | --- | --- |
| VARIABLES | Ln (GDP) | Ln (GDP) | Ln (GDP) | Ln (GDP) | Ln (GDP) | Ln (GDP) | Ln (GDP) |
|  |  |  |  |  |  |  |  |
| Log AI | 0.00259 | -0.211*** | 0.0365** | 0.386*** | 0.0770** | 0.0796*** | 0.113*** |
|  | (0.00194) | (0.00536) | (0.0157) | (0.0364) | (0.0342) | (0.00251) | (0.00690) |
| Log AI2 |  | -0.0896*** | 0.00400*** | 0.00285* | -0.00243 | 0.00261*** | -0.00135** |
|  |  | (0.00223) | (0.00153) | (0.00173) | (0.00232) | (0.000298) | (0.000536) |
| Log Prec |  |  | 0.0665*** | 0.385*** | 0.0370 | 0.0614*** | 0.102*** |
|  |  |  | (0.0175) | (0.0360) | (0.0363) | (0.00281) | (0.00699) |
| Log Temp |  |  | -0.00827*** | 0.00269 | -0.00863*** | 0.00485*** | 0.00499*** |
|  |  |  | (0.00138) | (0.00417) | (0.00175) | (0.000321) | (0.000587) |
| Log PET |  |  | -0.0108 | -0.128*** | -0.124*** | -0.0779*** | -0.189*** |
|  |  |  | (0.00690) | (0.0285) | (0.0148) | (0.00333) | (0.00901) |
| Log GDP t-1 | 0.566*** | 0.529*** | 0.724*** | 0.580*** | 0.591*** | 0.232*** | 0.308*** |
|  | (0.00431) | (0.00509) | (0.0118) | (0.0251) | (0.0216) | (0.00639) | (0.00915) |
| Constant |  |  |  |  |  | 7.383*** | 6.362*** |
|  |  |  |  |  |  | (0.0596) | (0.084) |
| Grid FE | YES | YES | YES | YES | YES | YES | YES |
| Year FE | YES | YES | YES | YES | YES | YES | YES |
| Country X Year FE |  |  | YES | YES | YES | YES | YES |
|  |  |  |  |  |  |  |  |
| World | YES | YES | YES |  |  | YES |  |
| Africa |  |  |  | YES |  |  | YES |
| Asia |  |  |  |  | YES |  |  |
| Arid and Sub-Humid |  |  |  |  |  | YES | YES |
|  |  |  |  |  |  |  |  |
| Observations | 1,623,531 | 1,623,531 | 1,101,680 | 250,125 | 293,405 | 680,713 | 137,182 |
| Number of id | 65,247 | 65,247 | 55,026 | 10,005 | 18,320 | 43,299 | 6,654 |

*Note.* This table presents the effects of variation in the Aridity Index on GDP per capita at the grid level using the Arellano-Bond estimator. Robust standard errors in parentheses *** p<0.01, ** p<0.05, * p<0.1

Table 4: Effects of AI on GDP on different aridity classes by year, grid fixed effects, and country trends

|  | (1) | (3) | (2) | (4) | (5) |
| --- | --- | --- | --- | --- | --- |
| VARIABLES | Hyper_Arid | Arid | Semi-Arid | Sub-Humid | Humid |
|  |  |  |  |  |  |
| Log AI | -0.177*** | -0.00311 | 0.0813*** | 0.126*** | -0.00406 |
|  | (0.0176) | (0.00816) | (0.0105) | (0.0466) | (0.00397) |
| Log AI 2 | 0.000282** | -0.00943*** | 0.00507*** | -0.0575 | 0.0112*** |
|  | (0.000134) | (0.00314) | (0.00153) | (0.0408) | (0.00188) |
| Log Prec | 0.180*** | 0.00990* | -0.0490*** | 0.0614*** | 0.00671 |
|  | (0.0177) | (0.00521) | (0.00852) | (0.00612) | (0.00451) |
| Log Temp | 0.00356*** | -0.000952** | 0.00627*** | 0.000364 | 0.00144*** |
|  | (0.00130) | (0.000435) | (0.000915) | (0.000490) | (0.000305) |
| Log GDP t-1 | 0.912*** | 0.910*** | 0.891*** | 0.917*** | 0.925*** |
|  | (0.00249) | (0.000960) | (0.00226) | (0.00154) | (0.000909) |
| Constant | 0.509*** | 0.857*** | 1.154*** | 0.713*** | 0.698*** |
|  | (0.0386) | (0.0112) | (0.0288) | (0.0196) | (0.00849) |
|  |  |  |  |  |  |
| Observations | 170,754 | 306,093 | 242,718 | 124,974 | 257,080 |
| R-squared | 0.883 | 0.933 | 0.921 | 0.951 | 0.945 |
| Number of id | 10,723 | 28,852 | 17,896 | 18,392 | 19,813 |
| Grid FE | YES | YES | YES | YES | YES |
| Year FE | YES | YES | YES | YES | YES |
| Country X Year FE | YES | YES | YES | YES | YES |
| World | YES | YES | YES | YES | YES |

*Note.* This table presents the results of the effects of the Aridity Index on GDP per capita per different classes of aridity. Robust standard errors in parentheses *** p<0.01, ** p<0.05, * p<0.1

Table 5: Effects of AI on GDP on different income classes by year, grid fixed effects, and country trends

|  | (1) | (2) | (3) | (4) |
| --- | --- | --- | --- | --- |
| VARIABLES | Low | Lower Middle | Upper Middle | High |
|  |  |  |  |  |
| Log AI | 0.00168** | 0.161*** | 0.123*** | 0.0230*** |
|  | (0.000839) | (0.00800) | (0.00878) | (0.00330) |
| Log AI 2 | -0.102*** | -0.00240*** | -0.00349*** | 0.000781** |
|  | (0.0101) | (0.000806) | (0.000926) | (0.000373) |
| Log Prec | 0.130*** | 0.158*** | 0.146*** | -0.0261*** |
|  | (0.0104) | (0.00869) | (0.0104) | (0.00359) |
| Log Temp | 0.00999*** | 0.00591*** | 0.00520*** | 0.000458 |
|  | (0.00167) | (0.000814) | (0.000423) | (0.000311) |
| Log GDP t-1 | 0.837*** | 0.729*** | 0.599*** | 0.731*** |
|  | (0.00517) | (0.00376) | (0.00774) | (0.0101) |
| Constant | 1.130*** | 2.658*** | 3.967*** | 2.887*** |
|  | (0.0438) | (0.0384) | (0.0803) | (0.110) |
|  |  |  |  |  |
| Observations | 194,162 | 138,762 | 110,414 | 237,375 |
| R-squared | 0.878 | 0.860 | 0.741 | 0.897 |
| Number of id | 13,307 | 16,130 | 14,058 | 21,015 |
| Grid FE | YES | YES | YES | YES |
| Year FE | YES | YES | YES | YES |
| Country X Year FE | YES | YES | YES | YES |
| World | YES | YES | YES | YES |

*Note.* This table presents the results of the effects of the Aridity Index on GDP per capita per different classes of income. Robust standard errors in parentheses *** p<0.01, ** p<0.05, * p<0.1

Table 6: Effects of AI on GDP with the inclusion of temporal dependence by year, grid fixed effects, and country trends

|  | (1) | (2) | (3) | (4) | (5) |
| --- | --- | --- | --- | --- | --- |
| VARIABLES | Ln (GDP) | Ln (GDP) | Ln (GDP) | Ln (GDP) | Ln (GDP) |
|  |  |  |  |  |  |
| AI | 0.00861*** | 0.0633*** | 0.0525*** | 0.0535*** | 0.0137*** |
|  | (0.000481) | (0.00368) | (0.00204) | (0.00277) | (0.00112) |
| AI 2 | 0.000664*** | -0.000144** | 0.000186*** | 0.000744* | 0.0141 |
|  | (5.87e-05) | (6.49e-05) | (6.49e-05) | (0.000420) | (0.0105) |
| AI t-1 | -0.00401*** | -0.0882*** | -0.118*** | -0.195*** | 0.262*** |
|  | (0.000284) | (0.00251) | (0.00265) | (0.00359) | (0.0131) |
| AI t-2 |  |  | 0.144*** | 0.158*** | -0.0853*** |
|  |  |  | (0.00257) | (0.00344) | (0.0111) |
| Prec |  | -0.0650*** | -0.0497*** | -0.0458*** | 0.00368 |
|  |  | (0.00377) | (0.00230) | (0.00305) | (0.0109) |
| Log GDP t-1 | 0.909*** | 0.909*** | 0.902*** | 0.900*** | 0.883*** |
|  | (0.000442) | (0.000443) | (0.000491) | (0.000611) | (0.00162) |
| Prec t-1 |  | 0.0898*** | 0.121*** | 0.204*** | -0.262*** |
|  |  | (0.00262) | (0.00276) | (0.00383) | (0.0130) |
| Prec t-2 |  |  | -0.144*** | -0.163*** | 0.0875*** |
|  |  |  | (0.00266) | (0.00365) | (0.0111) |
| Constant | 0.892*** | 0.888*** | 1.021*** | 1.005*** | 1.274*** |
|  | (0.00432) | (0.00554) | (0.00603) | (0.00726) | (0.0266) |
|  |  |  |  |  |  |
| Observations | 1,623,531 | 1,623,531 | 1,558,284 | 1,005,684 | 240,120 |
| R-squared | 0.993 | 0.993 | 0.993 | 0.993 | 0.996 |
| Grid FE | YES | YES | YES | YES | YES |
| Year FE | YES | YES | YES | YES | YES |
| Country X Year FE | YES | YES | YES | YES | YES |
| World | YES | YES | YES | YES |  |
| Africa |  |  |  |  | YES |
| Arid and Sub-Humid |  |  |  | YES |  |

*Note.* Robust standard errors in parentheses *** p<0.01, ** p<0.05, * p<0.1

Table 7: Effects of AI on GDP with the inclusion of temporal and spatial dependence by year, grid fixed effects, and country trends

|  | (1) | (2) | (3) | (4) |
| --- | --- | --- | --- | --- |
| VARIABLES | Ln (GDP) | Ln (GDP) | Ln (GDP) | Ln (GDP) |
|  |  |  |  |  |
| Log GDP t-1 | 0.176*** | 0.272*** | 0.913*** | 0.244*** |
|  | (0.00380) | (0.00607) | (0.00246) | (0.00762) |
| W * Log GDP | 0.841*** | 0.746*** | 1.014*** | 0.772*** |
|  | (0.00366) | (0.00599) | (0.00289) | (0.00741) |
| Log AI | -0.000974 | 0.00549** | 0.00244* | 0.0145*** |
|  | (0.000963) | (0.00221) | (0.00131) | (0.00414) |
| Log AI t-1 | 0.00131 | 0.000957 | 0.00536*** | 0.00162** |
|  | (0.000925) | (0.000851) | (0.000924) | (0.000669) |
| Log AI t-2 |  | 0.00208** | 0.00538*** | 0.00244*** |
|  |  | (0.000929) | (0.00125) | (0.000749) |
| W * Log AI | 0.00177* | 0.00140 | -0.000601 | 0.000701 |
|  | (0.000987) | (0.000928) | (0.00106) | (0.000716) |
| W * Log AI t-1 | -0.00194** | -0.00106 | -0.00538*** | -0.00161** |
|  | (0.000955) | (0.000885) | (0.000938) | (0.000680) |
| W * Log AI t-2 |  | -0.00197** | -0.00536*** | -0.00267*** |
|  |  | (0.000961) | (0.00127) | (0.000762) |
| Log Prec |  | -0.00562*** | -0.00223*** | 0.0147*** |
|  |  | (0.00200) | (0.000833) | (0.00415) |
| Log Temp |  | 5.04e-05 | 6.74e-06 | -0.000261 |
|  |  | (0.000135) | (6.13e-05) | (0.000257) |
| Constant | -0.162*** | -0.149*** | -0.00216* | -0.143*** |
|  | (0.00730) | (0.00635) | (0.00112) | (0.00796) |
|  |  |  |  |  |
| Observations | 1,615,180 | 1,052,744 | 651,187 | 520,667 |
| R-squared | 0.999 | 0.999 | 1.000 | 0.999 |
| Grid FE | YES | YES | YES | YES |
| Year FE | YES | YES | YES | YES |
| Country X Year FE | YES | YES | YES | YES |
| World | YES | YES | YES |  |
| Africa |  |  |  | YES |
| Arid and Sub-Humid |  |  | YES |  |

*Note.* Robust standard errors in parentheses *** p<0.01, ** p<0.05, * p<0.1

Table 8: Effects of AI on GDP per class of aridity by temporal and spatial dependence, year, grid fixed effects, and country trends

|  | (1) | (2) | (3) | (4) | (5) |
| --- | --- | --- | --- | --- | --- |
| VARIABLES | Hyper-Arid | Arid | Semi-Arid | Sub-Humid | Humid |
|  |  |  |  |  |  |
| Log GDP t-1 | 0.927*** | 0.890*** | 0.918*** | 0.932*** | 0.929*** |
|  | (0.00457) | (0.00610) | (0.00303) | (0.00418) | (0.00284) |
| W * Log GDP | 1.006*** | 1.012*** | 1.012*** | 1.026*** | 1.008*** |
|  | (0.00275) | (0.00424) | (0.00442) | (0.0101) | (0.00473) |
| Log AI | 0.000313* | 0.00432*** | 0.00451*** | 0.0111*** | 0.00420*** |
|  | (0.000184) | (0.00132) | (0.00137) | (0.00319) | (0.00152) |
| Log AI t-1 | -0.00320 | 0.00182 | 0.00116 | 0.00902* | -0.00380 |
|  | (0.00333) | (0.00247) | (0.00180) | (0.00515) | (0.00246) |
| Log AI t-2 | 0.000171 | 0.00869*** | 0.000826 | 0.00998* | 1.73e-05 |
|  | (0.000206) | (0.00161) | (0.00146) | (0.00537) | (0.00138) |
| W * Log AI | -0.000283 | -0.00437*** | -0.00458*** | -0.0104*** | -0.00375** |
|  | (0.000190) | (0.00134) | (0.00140) | (0.00319) | (0.00154) |
| W * Log AI t-1 | 1.88e-05 | 0.000621 | 0.00140 | -0.0121*** | 0.00167 |
|  | (0.000195) | (0.00169) | (0.00145) | (0.00440) | (0.00185) |
| W * Log AI t-2 | -0.000159 | -0.00868*** | -0.000895 | -0.00980* | -0.000174 |
|  | (0.000210) | (0.00164) | (0.00148) | (0.00536) | (0.00141) |
| Log Prec | 0.00321 | -0.00260 | -0.00291** | -0.00166 | 0.00177 |
|  | (0.00334) | (0.00201) | (0.00130) | (0.00222) | (0.00172) |
| Log Temp | -0.000248 | 7.40e-05 | -6.96e-06 | -6.77e-05 | -0.000151*** |
|  | (0.000188) | (0.000185) | (9.52e-05) | (8.97e-05) | (5.35e-05) |
| Constant | -0.00317 | -0.00183 | -0.00151 | -0.00861*** | -0.00108 |
|  | (0.00527) | (0.00267) | (0.00153) | (0.00235) | (0.00233) |
|  |  |  |  |  |  |
| Observations | 163,157 | 232,551 | 292,638 | 119,395 | 244,943 |
| R-squared | 1.000 | 1.000 | 1.000 | 1.000 | 1.000 |
| Grid FE | YES | YES | YES | YES | YES |
| Year FE | YES | YES | YES | YES | YES |
| Country X Year FE | YES | YES | YES | YES | YES |
| World | YES | YES | YES | YES | YES |

*Note.* Robust standard errors in parentheses *** p<0.01, ** p<0.05, * p<0.1

Table 9: Effects of AI on GDP per income class by temporal and spatial dependence, year, grid fixed effects, and country trends

|  | (1) | (2) | (3) | (4) |
| --- | --- | --- | --- | --- |
| VARIABLES | Low | Lower Middle | Upper Middle | High |
|  |  |  |  |  |
| Log GDP t-1 | 0.868*** | 0.854*** | 0.820*** | 0.868*** |
|  | (0.00832) | (0.00511) | (0.0116) | (0.00884) |
| W * Log GDP | 1.032*** | 0.955*** | 0.983*** | 1.007*** |
|  | (0.00425) | (0.00630) | (0.00406) | (0.00438) |
| Log AI | 0.00520*** | 0.00628*** | -0.00402 | 0.00193* |
|  | (0.00144) | (0.00207) | (0.00292) | (0.00105) |
| Log AI t-1 | 0.00790** | 0.00183 | -0.000947 | -0.00519*** |
|  | (0.00353) | (0.00322) | (0.00411) | (0.00137) |
| Log AI t-2 | 0.00328** | 0.00721*** | -0.00330 | -0.000120 |
|  | (0.00156) | (0.00207) | (0.00331) | (0.00104) |
| W * Log AI | 0.00555*** | -0.00387* | 0.000623 | 0.00256** |
|  | (0.00192) | (0.00234) | (0.00367) | (0.00115) |
| W * Log AI t-1 | -0.00553*** | -0.00601*** | 0.00370 | -0.00207* |
|  | (0.00147) | (0.00211) | (0.00305) | (0.00106) |
| W * Log AI t-2 | -0.00385** | -0.00733*** | 0.00442 | 2.34e-05 |
|  | (0.00157) | (0.00213) | (0.00343) | (0.00104) |
| Log Prec | -0.0137*** | 0.00136 | 0.000333 | 0.00257*** |
|  | (0.00292) | (0.00252) | (0.00224) | (0.000820) |
| Log Temp | 9.25e-05 | 0.000421* | 0.000343*** | -3.58e-05 |
|  | (0.000621) | (0.000217) | (0.000119) | (4.69e-05) |
| Constant | 0.00649 | 0.0898*** | 0.191*** | 0.0442*** |
|  | (0.00398) | (0.00694) | (0.0147) | (0.00644) |
|  |  |  |  |  |
| Observations | 236,659 | 195,001 | 148,505 | 309,422 |
| R-squared | 0.999 | 0.993 | 0.988 | 0.998 |
| Grid FE | YES | YES | YES | YES |
| Year FE | YES | YES | YES | YES |
| Country X Year FE | YES | YES | YES | YES |
| World | YES | YES | YES | YES |

*Note.* Robust standard errors in parentheses *** p<0.01, ** p<0.05, * p<0.1

1. Grid level data of precipitation, temperature, potential evapotranspiration, and agricultural suitability are available at a lower resolution scale than GDP per capita data (0.083 degrees of latitude by 0.083 degrees of longitude, which correspond to approximately 10 km at the equator). Annual GDP per capita data is available at 0.5 degrees of latitude by 0.5 degrees of longitude. Therefore, to conduct the empirical procedure, we first up-scaled the weather variables to the same grid resolution of GDP per capita. [↑](#footnote-ref-1)
2. This dataset comprises gap-filled sub-national data, supplemented by national data where necessary. Data gaps were filled by using national temporal pattern. The dataset has a global extent at a 5 arc-min resolution for the 26 years from 1990–2015. [↑](#footnote-ref-2)
3. Burke et al. (2015) showed that economic productivity was non-linear in temperature in all countries, with productivity peaking at an annual average temperature of 13 °C and declining strongly at higher temperatures. [↑](#footnote-ref-3)
4. Examples of large increases in precipitation are sudden floods which might hamper agriculture yields). [↑](#footnote-ref-4)
5. A significant increase in potential evo-transpiration substantially reduces water in the soil. [↑](#footnote-ref-5)
